# Supplementary material
Source: PubMed Central journal article supplement (PMC4119272)
Supplement: mmc1.pdf [file mmc1.pdf]

# Probing the conformation of FhaC with small angle neutron scattering and molecular modeling

Frank Gabel<sup>†1,2,3,4</sup>, Marc F. Lensink<sup>†\*5</sup>, Bernard Clantin<sup>5</sup>, Françoise Jacob-Dubuisson<sup>6,7,8,9</sup>, Vincent Villeret<sup>5</sup>, and Christine Ebel<sup>\*1,2,3</sup>

## Supplementary file

### Content of this file:

Figure S1. d17-OG characterization by AUC.

Table S1. d17-OG characteristics from AUC.

Figure S2. SANS of d17-OG.

Table S2. Complete overview over all WT FhaC detergent models and their respective  $\chi^2$  fit values with the program CRYSON.

Table S3. Complete overview over all FhaC- $\Delta$ H1 models and their respective  $\chi^2$  fit values with the program CRYSON.

Figure S3. Modeling detergent- FhaC- $\Delta$ H1 complexes at 90% D<sub>2</sub>O.

Figure S4. Modeling detergent- FhaC- $\Delta$ H1 complexes at 42% D<sub>2</sub>O.

Table S4. Overview over the 100 WT FhaC models with a reduced detergent belt (140 detergent molecules out of an initial 200) and their respective  $\chi^2$  fit values with the program CRYSON.

Figure S5. FhaC- $\Delta$ H1 -detergent models corresponding to good (A) and bad (B) fits.

Supporting references.

### Additional supplemental files:

**Movie S1. Illustrative movie of the association of 140 detergent molecules to the membrane protein FhaC.** FhaC was initially placed in a lipid bilayer, after which selected lipids were replaced by d17-OG detergent molecules. A subsequent molecular dynamics simulation in vacuo, where protein coordinates were removed from the equations of motion, relaxes the detergent into a momentaneous, nonhomogeneous organization around the protein.

**Zip S1. Figures accompanying Figure 6.** High resolution images that were used to create Figure 6.

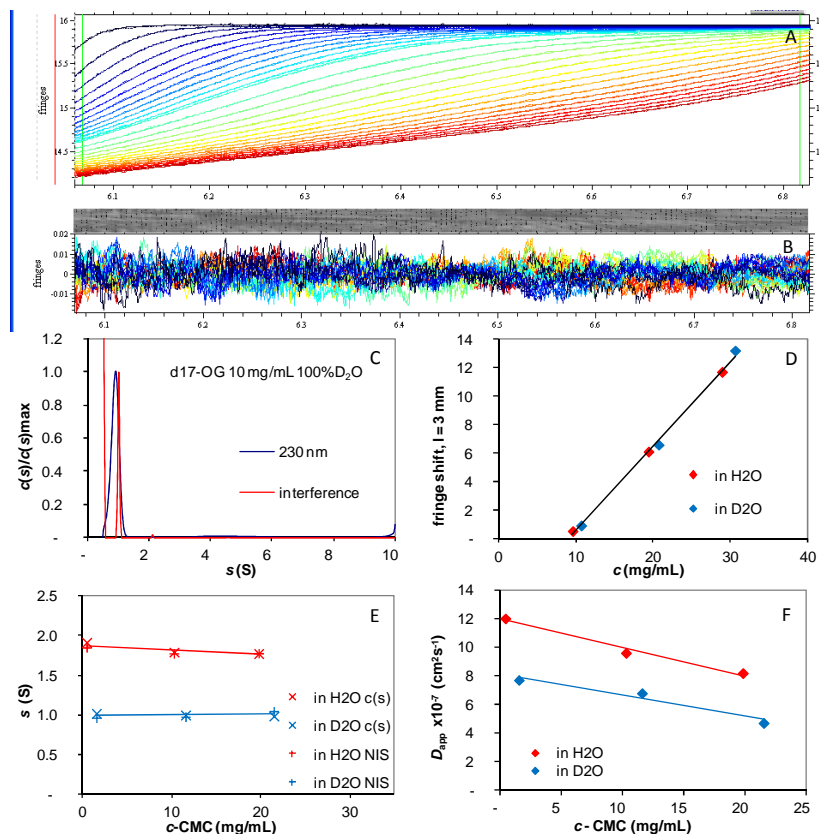

**Figure S1. d17-OG characterization by AUC.**

Sedimentation velocity was measured during 21 hours at 42000 rpm at 20°C, for samples of d17-OG, at 28.9, 19.4 and 9.6 mg/mL in H<sub>2</sub>O and 30.6, 20.7 and 10.7 mg/mL in D<sub>2</sub>O, in 3 mm optical path length cells, at 230 nm and using interference optics. The analysis was done with the program SEDFIT v 11.8, in terms of  $c(s)$  analysis and of two non interacting species, *i.e.* monomer and micelle. Panels (A-C) show the  $c(s)$  analysis for d17-OG at 10.7 mg/mL in D<sub>2</sub>O. (A): superposition of experimental and fitted sedimentation velocity profiles obtained with interference optics; (B): their differences; (C): superposition of the  $c(s)$  profiles from 230 nm and interference data, showing the micelle at  $s \approx 1$  S. In H<sub>2</sub>O,  $s \approx 1.8$  S. The micelles peak was sometimes splitted. (D): plot of the fringe shift numbers for the micelle as a function of d17-OG concentration. From the mean slope, the refractive index increment  $\partial n/\partial c$  and the critical micelle concentration CMC are derived according to e.g. (1). (E): Linear extrapolation of  $s$  at infinite dilution for d17-OG micelle, leading to  $s^\circ$ , obtained from interference data analysed in terms of  $c(s)$  and of non-interacting species (NIS). (F): Linear extrapolation of the apparent diffusion coefficients  $D_{app}$  at infinite dilution of d17-OG micelle, leading to  $D^\circ$ , from the non-interacting species analysis of interference data. The diffusion coefficients given by the software are indeed apparent ones, since the boundaries are affected by weak interparticular interactions (2). The obtained numerical values are given in Table S11.

**Table S1. d17-OG characteristics from AUC.**

| Solvent          | $\rho^\circ$ | $\eta^\circ$ | CMC  | +/- | $\partial n/\partial c$ | +/-   | $s^\circ$ | +/-  | $D^\circ$                                    | +/- | $M_b$ | +/- | $R_H$ | +/- | $M$  | +/- | $N_{agg}$ | +/- |
|------------------|--------------|--------------|------|-----|-------------------------|-------|-----------|------|----------------------------------------------|-----|-------|-----|-------|-----|------|-----|-----------|-----|
|                  | g/mL         | cp           | mM   |     | mL/g                    |       | S         |      | $\times 10^{-7} \text{ cm}^2 \text{ s}^{-1}$ |     | kDa   |     | nm    |     | kDa  |     |           | %   |
| H <sub>2</sub> O | 0.998        | 1.002        | 29.5 | 1.2 | 0.135                   | 0.005 | 1.87      | 0.03 | 12                                           | 1   | 3.8   | 0.4 | 1.8   | 0   | 19.8 | 2.0 | 64        | 10  |
| D <sub>2</sub> O | 1.106        | 1.250        |      |     |                         |       | 0.99      | 0.04 | 8                                            | 1   | 3.01  | 0.5 | 2.1   | 0   | 25.6 | 4.8 | 83        | 19  |

$\rho^\circ$  and  $\eta^\circ$  are the solvent density and viscosity. The  $cmc$  and  $\partial n/\partial c$ ,  $s^\circ$  and  $D^\circ$  are derived from Fig. S11 D-F. The buoyant molar mass,  $M_b$ , and hydrodynamic radius,  $R_H$ , of the micelle are derived from  $s^\circ$  and  $D^\circ$ , according to:  $s^\circ/D^\circ = M_b/RT$ , and  $D^\circ = RT/N_A 6\pi\eta^\circ R_H$ , with  $R$  the gaz constant,  $T$  the absolute temperature,  $N_A$  Avogadro's number. The molar mass  $M$  and aggregation number,  $N_{agg}$ , of the micelles are derived in H<sub>2</sub>O from  $M_b = M(1 - \rho^\circ \bar{v})$ , with  $\bar{v} = 0.81$  mL/g for d17-OG, calculated assuming the invariance of the molar volumes with deuteration from the value of 0.859 mL/g for n-octyl-glucoside (OG) (3), and the molar mass for d17-OG and OG monomers of 309 and 292.4 g/mole, respectively. In D<sub>2</sub>O, we use  $M_b = M[(M_b/M) - \rho^\circ \bar{v}]$  (4), with  $M_D = 313$  g/mole the molar mass in D<sub>2</sub>O of d17-OG, which has 4 labile Hydrogen atoms. These values are close to that given in litterature for OG: CMC of 18-20 mM, aggregation number of 27-100 or 90,  $\partial n/\partial c$  of 0.1159 mL/g (<http://www.affymetrix.com> and (3)).

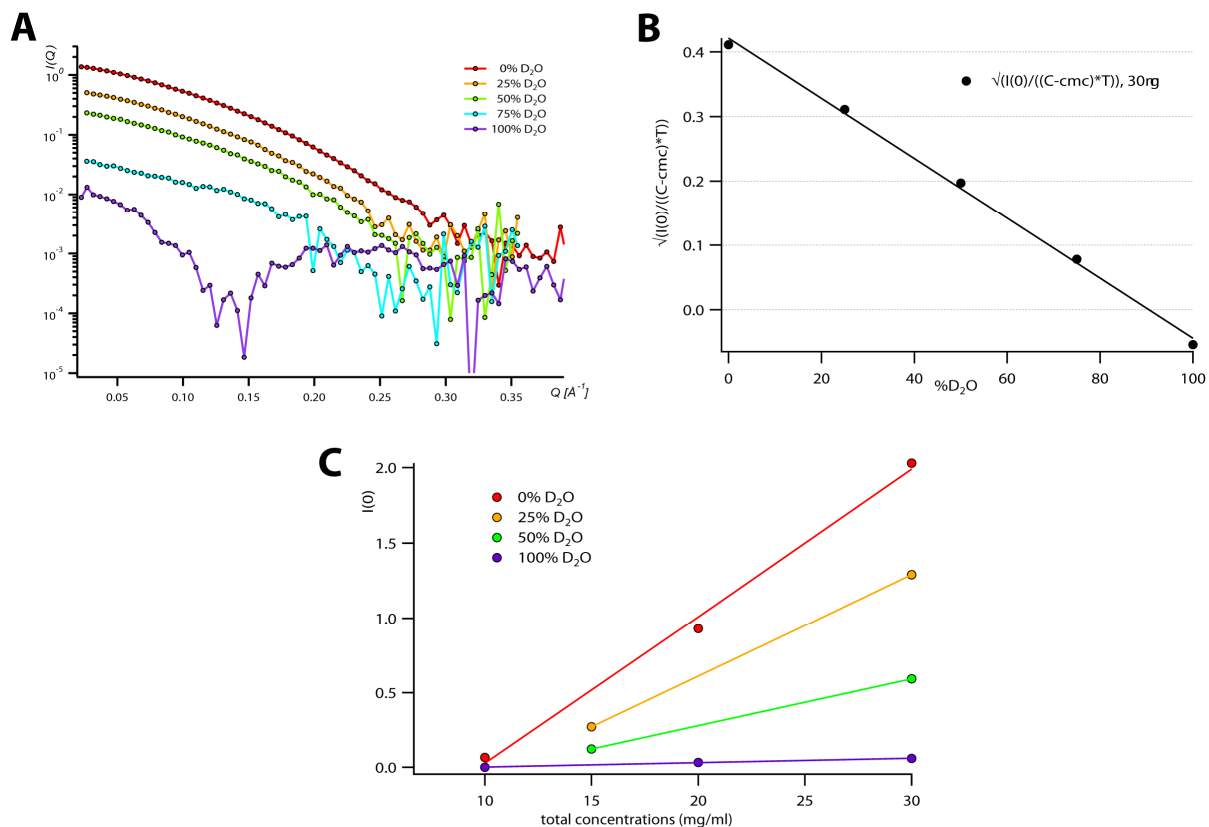

**Figure S2. SANS of d17-OG.** A) SANS curves at 30 mg/ml as a function of contrast, B) determination of the contrast match point (CMP) from the  $I(0)$  intensities at 30 mg/ml, C) determination of the critical micelle concentration (CCM) of d17-OG from the  $I(0)$  intensities as a function of contrast.

**Table S2. Complete overview over all WT FhaC detergent models and their respective  $\chi^2$  fit values with the program CRYSON.**

|            | <b>WT<sub>0</sub></b> |                | <b>WT<sub>1</sub></b> |                | <b>WT<sub>2</sub></b> |                |
|------------|-----------------------|----------------|-----------------------|----------------|-----------------------|----------------|
|            | <b>42% D2O</b>        | <b>90% D2O</b> | <b>42% D2O</b>        | <b>90% D2O</b> | <b>42% D2O</b>        | <b>90% D2O</b> |
| <b>120</b> | 4,14                  | 1,861          | 8,343                 | 3,284          | 3,297                 | 2,166          |
|            | 6,18                  | 2,11           | 6,376                 | 1,916          | 5,414                 | 1,964          |
|            | 8,12                  | 1,33           | 4,239                 | 1,844          | 2,369                 | 2,396          |
|            | 5,71                  | 2,413          | 13,72                 | 2,876          | 6,829                 | 2,159          |
|            | 9,06                  | 1,787          | 5,404                 | 1,558          | 5,287                 | 2,289          |
|            | 4,53                  | 2,341          | 3,683                 | 1,962          | 4,333                 | 2,581          |
|            | 5,24                  | 1,73           | 3,202                 | 2,21           | 5,102                 | 2,257          |
|            | 6,24                  | 2,249          | 11,732                | 2,96           | 3,838                 | 2,123          |
|            | 7,48                  | 1,338          | 4,663                 | 1,974          | 1,437                 | 2,265          |
|            | 6,24                  | 1,325          | 6,169                 | 2,446          | 4,33                  | 2,08           |
|            | 7,04                  | 1,354          | 7,034                 | 1,889          | 5,353                 | 2,423          |
|            | 4,91                  | 2,228          | 5,344                 | 2,071          | 8,221                 | 2,405          |
|            | 9,15                  | 2,148          | 9,803                 | 2,673          | 8,693                 | 2,061          |
|            | 8,89                  | 2,069          | 5,954                 | 2,432          | 6,047                 | 2,794          |
|            | 6,54                  | 1,535          | 5,313                 | 2,794          | 3,544                 | 2,907          |
|            | 6,56                  | 1,289          | 5,276                 | 2,426          | 2,011                 | 2,009          |
|            | 2,35                  | 1,561          | 8,769                 | 2,986          | 6,979                 | 2,309          |
|            | 6,55                  | 2,262          | 4,598                 | 1,988          | 5,1                   | 2,117          |
|            | 5,09                  | 2,408          | 2,921                 | 1,815          | 5,058                 | 2,673          |

|            |                |               |                |                |                |                |
|------------|----------------|---------------|----------------|----------------|----------------|----------------|
|            | 4,19           | 2,002         | 3,571          | 2,117          | 7,911          | 2,433          |
|            | <b>6,21</b>    | <b>1,867</b>  | <b>6,3057</b>  | <b>2,31105</b> | <b>5,05765</b> | <b>2,32055</b> |
| <b>125</b> | 3,833          | 1,532         | 4,623          | 2,214          | 5,075          | 2,197          |
|            | 4,156          | 1,578         | 6,225          | 2,034          | 5,356          | 2,271          |
|            | 4,814          | 1,398         | 4,902          | 1,812          | 4,973          | 2,515          |
|            | 6,558          | 2,211         | 5,646          | 2,068          | 3,721          | 2,335          |
|            | 4,441          | 1,789         | 5,12           | 2,326          | 4,769          | 2,336          |
|            | 4,002          | 2,311         | 8,151          | 2,616          | 4,432          | 2,256          |
|            | 4,518          | 1,826         | 5,063          | 2,251          | 5,417          | 2,71           |
|            | 4,695          | 1,694         | 3,48           | 2,278          | 4,62           | 2,266          |
|            | 5,651          | 1,28          | 7,25           | 2,409          | 4,86           | 2,295          |
|            | 6,528          | 1,217         | 10,134         | 3,021          | 6,963          | 2,316          |
|            | 6,677          | 2,245         | 11,386         | 3,302          | 4,638          | 2,389          |
|            | 8,831          | 1,452         | 8,639          | 3,396          | 6,693          | 2,6            |
|            | 1,947          | 1,929         | 8,716          | 3,012          | 3,156          | 2,429          |
|            | 7,212          | 1,545         | 5,862          | 2,309          | 7,623          | 1,813          |
|            | 5,679          | 1,699         | 4,936          | 1,925          | 5,274          | 1,902          |
|            | 6,424          | 1,461         | 3,771          | 1,991          | 6,087          | 1,7            |
|            | 5,113          | 1,77          | 7,772          | 3,267          | 3,066          | 1,866          |
|            | 4,555          | 1,448         | 9,25           | 2,761          | 5,005          | 2,322          |
|            | 4,928          | 2,015         | 5,305          | 2,234          | 5,303          | 2,825          |
|            | 4,53           | 1,543         | 4,543          | 2,56           | 5,719          | 2,025          |
|            | <b>5,25</b>    | <b>1,70</b>   | <b>6,5387</b>  | <b>2,4893</b>  | <b>5,1375</b>  | <b>2,2684</b>  |
| <b>130</b> | 6,124          | 1,288         | 4,468          | 2,06           | 4,547          | 2,085          |
|            | 1,662          | 2,09          | 8,201          | 2,657          | 5,616          | 2,737          |
|            | 6,374          | 1,377         | 3,216          | 2,404          | 6,672          | 2,562          |
|            | 4,818          | 2,42          | 8,2            | 1,964          | 6,916          | 1,907          |
|            | 7,365          | 2,038         | 7,889          | 3,588          | 2,728          | 1,99           |
|            | 4,876          | 1,265         | 6,549          | 2,643          | 4,517          | 1,699          |
|            | 2,495          | 2,546         | 7,099          | 2,013          | 6,418          | 2,307          |
|            | 7,233          | 1,309         | 4,531          | 1,729          | 1,953          | 2,113          |
|            | 9,079          | 1,306         | 6,134          | 2,727          | 1,647          | 2,141          |
|            | 5,956          | 1,477         | 5,246          | 2,304          | 5,184          | 1,878          |
|            | 3,607          | 2,452         | 6,588          | 2,493          | 5,534          | 2,512          |
|            | 7,257          | 1,456         | 8,848          | 2,587          | 3,844          | 2,245          |
|            | 1,626          | 2,434         | 5,32           | 2,058          | 6,243          | 2,428          |
|            | 4,655          | 1,696         | 4,927          | 2,343          | 5,916          | 2,549          |
|            | 2,873          | 1,841         | 2,513          | 1,643          | 2,567          | 2,742          |
|            | 3,998          | 1,379         | 6,359          | 2,799          | 3,887          | 2,13           |
|            | 6,307          | 1,584         | 9,57           | 1,966          | 1,974          | 2,22           |
|            | 3,371          | 1,928         | 8,198          | 2,767          | 5,851          | 2,042          |
|            | 4,514          | 1,339         | 6,136          | 3,062          | 5,767          | 2,501          |
|            | 6,333          | 1,723         | 3,755          | 2,297          | 9,559          | 2,463          |
|            | <b>5,02615</b> | <b>1,7474</b> | <b>6,18735</b> | <b>2,4052</b>  | <b>4,867</b>   | <b>2,26255</b> |
| <b>135</b> | 4,665          | 1,298         | 6,282          | 2,3            | 7,225          | 2,606          |
|            | 3,316          | 1,924         | 3,746          | 1,262          | 6,357          | 2,285          |
|            | 7,203          | 1,573         | 6,673          | 2,449          | 5,866          | 2,461          |
|            | 2,714          | 1,552         | 4,734          | 1,652          | 5,919          | 1,944          |
|            | 2,555          | 2,49          | 4,78           | 2,527          | 3,815          | 2,268          |
|            | 4,228          | 1,432         | 6,352          | 1,887          | 6,964          | 2,389          |
|            | 3,04           | 2,115         | 8,254          | 2,212          | 2,172          | 2,296          |
|            | 6,888          | 1,655         | 4,941          | 1,453          | 4,941          | 2,33           |
|            | 7,587          | 1,558         | 6,393          | 2,586          | 4,279          | 2,635          |
|            | 6,467          | 2,035         | 6,633          | 2,623          | 4,693          | 2,14           |
|            | 3,542          | 1,734         | 4,854          | 1,836          | 3,242          | 1,753          |
|            | 7,069          | 1,357         | 7,208          | 3,267          | 5,569          | 2,646          |
|            | 3,478          | 1,965         | 9,464          | 2,479          | 5,435          | 2,441          |
|            | 3,534          | 1,559         | 5,652          | 1,801          | 5,882          | 2,708          |
|            | 3,014          | 2,218         | 3,861          | 1,657          | 7,559          | 2,521          |
|            | 8,669          | 1,854         | 10,416         | 2,254          | 1,759          | 2,812          |
|            | 7,107          | 1,921         | 5,741          | 1,927          | 5,31           | 1,964          |
|            | 3,467          | 1,704         | 5,296          | 2,345          | 3,141          | 1,963          |

|            |               |                |                |                |               |               |
|------------|---------------|----------------|----------------|----------------|---------------|---------------|
|            | 3,273         | 1,89           | 7,51           | 2,823          | 7,689         | 2,262         |
|            | 4,542         | 1,408          | 3,453          | 2,467          | 4,419         | 2,274         |
|            | <b>4,8179</b> | <b>1,7621</b>  | <b>6,11215</b> | <b>2,19035</b> | <b>5,1118</b> | <b>2,3349</b> |
| <b>140</b> | 5,408         | 1,553          | 6,48           | 2,683          | 3,395         | 1,825         |
|            | 2,311         | 1,883          | 5,493          | 1,887          | 6,908         | 2,527         |
|            | 7,352         | 1,167          | 7,763          | 2,659          | 3,169         | 1,863         |
|            | 6,947         | 1,516          | 7,172          | 2,387          | 3,205         | 2,351         |
|            | 2,726         | 2,763          | 5,491          | 2,125          | 6,5           | 2,218         |
|            | 7,2           | 2,213          | 6,122          | 2,435          | 4,91          | 2,616         |
|            | 3,777         | 2,094          | 7,339          | 2,208          | 3,71          | 2,008         |
|            | 4,551         | 1,818          | 3,624          | 1,936          | 3,659         | 2,453         |
|            | 4,157         | 1,546          | 7,947          | 2,047          | 6,064         | 2,405         |
|            | 6,69          | 1,53           | 9,528          | 2,377          | 5,459         | 2,469         |
|            | 6,515         | 1,466          | 5,67           | 2,108          | 5,45          | 2,155         |
|            | 9,957         | 1,44           | 4,911          | 2,533          | 4,765         | 2,194         |
|            | 5,432         | 2,047          | 6,521          | 2,283          | 3,628         | 2,121         |
|            | 2,058         | 2,022          | 2,24           | 1,322          | 5,253         | 2,133         |
|            | 8,015         | 1,846          | 7,111          | 2,719          | 3,616         | 2,747         |
|            | 6,951         | 1,264          | 5,497          | 1,898          | 1,907         | 2,176         |
|            | 5,446         | 1,928          | 10,088         | 2,778          | 2,792         | 2,232         |
|            | 2,648         | 2,059          | 9,216          | 2,808          | 2,83          | 2,261         |
|            | 5,914         | 1,725          | 4,876          | 2,419          | 4,95          | 2,319         |
|            | 9,354         | 1,617          | 5,486          | 3,095          | 5,56          | 2,117         |
|            | <b>5,67</b>   | <b>1,77485</b> | <b>6,42875</b> | <b>2,33535</b> | <b>4,3865</b> | <b>2,2595</b> |
| <b>145</b> | 5,326         | 1,616          | 9,754          | 3,52           | 4,262         | 2,533         |
|            | 4,471         | 2,382          | 3,292          | 2,067          | 7,31          | 2,283         |
|            | 5,187         | 1,743          | 8,456          | 3,872          | 4,195         | 2,085         |
|            | 5,909         | 2,251          | 5,861          | 2,067          | 7,602         | 2,02          |
|            | 6,214         | 1,659          | 4,892          | 2,31           | 3,589         | 2,243         |
|            | 4,019         | 1,921          | 6,981          | 2,147          | 5,119         | 3,18          |
|            | 2,225         | 1,79           | 5,087          | 1,981          | 4,713         | 2,407         |
|            | 3,733         | 1,991          | 6,691          | 3,102          | 7,313         | 2,346         |
|            | 5,82          | 1,24           | 9,69           | 3,417          | 2,46          | 2,012         |
|            | 5,719         | 1,726          | 7,959          | 2,981          | 3,252         | 2,628         |
|            | 6,739         | 1,617          | 6,793          | 2,432          | 5,669         | 2,697         |
|            | 5,297         | 1,458          | 5,613          | 2,108          | 4,717         | 2,724         |
|            | 6,547         | 2,043          | 7,451          | 2,336          | 8,197         | 2,001         |
|            | 2,512         | 2,118          | 1,727          | 1,281          | 5,756         | 2,42          |
|            | 5,703         | 1,862          | 3,086          | 1,662          | 2,541         | 2,32          |
|            | 5,456         | 1,717          | 6,922          | 3,446          | 2,979         | 1,651         |
|            | 5,132         | 1,942          | 9,72           | 2,965          | 6,234         | 2,262         |
|            | 2,857         | 2,771          | 5,343          | 2,466          | 3,989         | 2,424         |
|            | 7,457         | 1,888          | 9,08           | 3,005          | 4,108         | 2,758         |
|            | 8,037         | 1,486          | 5,506          | 2,713          | 5,301         | 2,304         |
|            | <b>5,218</b>  | <b>1,86105</b> | <b>6,4952</b>  | <b>2,5939</b>  | <b>4,9653</b> | <b>2,3649</b> |
| <b>150</b> | 7,92          | 1,374          | 4,332          | 2,642          | 4,704         | 2,739         |
|            | 4,487         | 2,141          | 6,897          | 2,164          | 7,967         | 2,777         |
|            | 7,526         | 1,367          | 5,87           | 2,795          | 4,772         | 2,403         |
|            | 5,707         | 1,476          | 10,653         | 2,557          | 6,358         | 2,049         |
|            | 6,394         | 1,823          | 4,964          | 2,51           | 4,634         | 2,434         |
|            | 5,898         | 1,899          | 5,556          | 2,378          | 6,555         | 2,183         |
|            | 2,006         | 2,054          | 4,879          | 2,325          | 5,434         | 3,03          |
|            | 4,709         | 1,416          | 4,987          | 2,559          | 5,895         | 2,516         |
|            | 5,88          | 1,722          | 8,98           | 2,353          | 2,707         | 3,068         |
|            | 5,365         | 1,356          | 6,189          | 2,215          | 6,426         | 2,086         |
|            | 6,601         | 1,625          | 5,57           | 1,846          | 6,419         | 2,836         |
|            | 9,102         | 1,774          | 8,157          | 2,545          | 6,996         | 2,081         |
|            | 3,901         | 2,483          | 6,242          | 1,823          | 5,682         | 2,472         |
|            | 1,609         | 2,543          | 8,513          | 2,297          | 5,513         | 2,587         |
|            | 5,331         | 1,233          | 7,385          | 2,969          | 2,549         | 2,431         |
|            | 5,689         | 1,749          | 8,065          | 2,007          | 2,431         | 2,263         |
|            | 5,11          | 1,556          | 12,873         | 3,516          | 2,835         | 2,326         |

|            |                |                |                |               |                |                |
|------------|----------------|----------------|----------------|---------------|----------------|----------------|
|            | 4,133          | 2,229          | 6,408          | 2,964         | 5,052          | 2,429          |
|            | 5,354          | 1,613          | 8,82           | 1,955         | 8,36           | 2,749          |
|            | 6,612          | 1,266          | 4,645          | 2,226         | 3,794          | 2,689          |
|            | <b>5,4667</b>  | <b>1,73495</b> | <b>6,99925</b> | <b>2,4323</b> | <b>5,25415</b> | <b>2,5074</b>  |
| <b>155</b> | 4,519          | 1,44           | 9,026          | 3,622         | 4,172          | 2,475          |
|            | 2,496          | 2,151          | 3,488          | 1,224         | 7,394          | 2,242          |
|            | 9,034          | 1,298          | 7,862          | 2,489         | 2,578          | 3,027          |
|            | 8,273          | 1,306          | 6,783          | 1,998         | 10,361         | 2,752          |
|            | 3,024          | 2,875          | 5,1            | 1,991         | 6,289          | 1,883          |
|            | 7,775          | 1,968          | 7,643          | 2,565         | 5,108          | 2,299          |
|            | 4,136          | 1,97           | 11,458         | 3,21          | 5,31           | 2,977          |
|            | 5,372          | 1,488          | 8,732          | 2,805         | 2,711          | 3,133          |
|            | 4,699          | 1,98           | 5,466          | 2,87          | 2,853          | 2,625          |
|            | 6,668          | 1,187          | 6,213          | 2,929         | 4,983          | 2,441          |
|            | 5,305          | 1,531          | 3,572          | 2,599         | 3,763          | 2,306          |
|            | 7,414          | 1,431          | 3,211          | 1,659         | 4,802          | 2,946          |
|            | 3,482          | 2,44           | 7,069          | 2,527         | 6,865          | 2,158          |
|            | 2,941          | 1,639          | 4,483          | 1,645         | 4,746          | 2,963          |
|            | 3,984          | 1,952          | 5,631          | 2,008         | 5,501          | 2,853          |
|            | 6,25           | 1,377          | 6,678          | 2,856         | 3,993          | 3,023          |
|            | 4,339          | 1,623          | 7,29           | 2,39          | 3,102          | 2,799          |
|            | 2,938          | 1,817          | 6,051          | 3,673         | 3,535          | 2,272          |
|            | 10,773         | 1,425          | 6,06           | 2,305         | 6,168          | 2,212          |
|            | 12,115         | 1,3            | 8,28           | 3,613         | 7,68           | 2,049          |
|            | <b>5,77685</b> | <b>1,7099</b>  | <b>6,5048</b>  | <b>2,5489</b> | <b>5,0957</b>  | <b>2,57175</b> |
| <b>160</b> | 5,159          | 1,849          | 3,582          | 2,393         | 5,713          | 2,043          |
|            | 6,829          | 2,011          | 5,15           | 2,123         | 3,174          | 2,854          |
|            | 5,66           | 2,088          | 2,518          | 2             | 3,207          | 2,891          |
|            | 5,041          | 1,663          | 9,276          | 2,482         | 4,127          | 2,233          |
|            | 3,388          | 2,459          | 5,792          | 2,078         | 7,276          | 2,113          |
|            | 4,19           | 2,382          | 7,053          | 2,412         | 6,265          | 3,591          |
|            | 6,043          | 1,399          | 6,18           | 2,622         | 5,829          | 2,62           |
|            | 4,347          | 1,39           | 8,657          | 2,073         | 5,639          | 3,287          |
|            | 4,291          | 1,745          | 10,187         | 2,838         | 10,111         | 2,39           |
|            | 5,988          | 1,35           | 8,239          | 2,696         | 4,218          | 2,43           |
|            | 4,597          | 1,909          | 4,11           | 1,643         | 4,55           | 2,279          |
|            | 6,85           | 1,905          | 3,737          | 1,371         | 5,869          | 2,695          |
|            | 3,658          | 2,328          | 6,737          | 2,773         | 2,943          | 2,346          |
|            | 5,976          | 1,719          | 4,063          | 1,827         | 5,277          | 2,005          |
|            | 6,57           | 1,79           | 5,567          | 2,793         | 2,322          | 2,935          |
|            | 5,063          | 2,032          | 7,998          | 2,257         | 4,315          | 2,569          |
|            | 6,799          | 1,55           | 10,633         | 2,923         | 4,174          | 2,03           |
|            | 3,395          | 2,362          | 4,425          | 1,854         | 3,312          | 2,637          |
|            | 2,504          | 2,461          | 6,226          | 2,536         | 6,502          | 2,241          |
|            | 6,686          | 1,454          | 5,306          | 1,768         | 5,454          | 2,646          |
|            | <b>5,1517</b>  | <b>1,8923</b>  | <b>6,2718</b>  | <b>2,2731</b> | <b>5,01385</b> | <b>2,54175</b> |

**Table S3. Complete overview over all FhaC- $\Delta$ H1 models and their respective  $\chi^2$  fit values with the program CRYSON.**

|            | $\Delta H_{10}$ |         | $\Delta H_{11}$ |         | $\Delta H_{12}$ |         |
|------------|-----------------|---------|-----------------|---------|-----------------|---------|
|            | 42% D2O         | 90% D2O | 42% D2O         | 90% D2O | 42% D2O         | 90% D2O |
| <b>120</b> | 2,79            | 0,971   | 3,034           | 0,885   | 3,097           | 0,76    |
|            | 2,82            | 0,93    | 2,565           | 0,829   | 3,992           | 0,764   |
|            | 2,34            | 0,963   | 5,658           | 0,636   | 3,404           | 0,677   |
|            | 3,21            | 1,146   | 2,734           | 0,681   | 2,762           | 0,883   |
|            | 3,70            | 1,053   | 2,944           | 0,743   | 3,337           | 0,712   |
|            | 3,55            | 0,903   | 2,758           | 0,833   | 2,769           | 0,765   |
|            | 4,34            | 0,917   | 1,944           | 0,832   | 2,607           | 0,784   |

|            |                |               |                |               |                |                |
|------------|----------------|---------------|----------------|---------------|----------------|----------------|
|            | 2,45           | 0,887         | 4,028          | 0,559         | 3,833          | 0,598          |
|            | 3,91           | 1,058         | 3,701          | 0,59          | 2,425          | 0,98           |
|            | 4,43           | 0,791         | 3,919          | 0,798         | 2,067          | 0,865          |
|            | 2,84           | 1,008         | 2,424          | 0,802         | 4,602          | 0,795          |
|            | 3,23           | 0,719         | 2,025          | 0,831         | 3,745          | 0,72           |
|            | 1,96           | 0,823         | 2,039          | 0,82          | 2,892          | 0,818          |
|            | 5,64           | 0,59          | 5,563          | 0,574         | 4,39           | 0,861          |
|            | 3,53           | 1,053         | 4,64           | 0,979         | 3,429          | 0,893          |
|            | 3,43           | 0,793         | 2,71           | 0,832         | 3,033          | 0,916          |
|            | 2,30           | 0,984         | 2,814          | 0,67          | 3,906          | 0,912          |
|            | 3,08           | 0,799         | 3,7            | 0,788         | 2,867          | 0,853          |
|            | 5,23           | 0,816         | 2,561          | 0,94          | 2,897          | 0,778          |
|            | 4,67           | 0,62          | 1,421          | 0,756         | 2,329          | 0,921          |
|            | <b>3,47205</b> | <b>0,8912</b> | <b>3,1591</b>  | <b>0,7689</b> | <b>3,21915</b> | <b>0,81275</b> |
| <b>125</b> | 3,554          | 0,971         | 1,962          | 0,913         | 3,795          | 0,701          |
|            | 3,815          | 1,059         | 3,688          | 0,614         | 2,728          | 0,798          |
|            | 4,481          | 0,873         | 4,584          | 0,527         | 3,161          | 0,876          |
|            | 3,925          | 0,99          | 3,168          | 0,528         | 3,72           | 0,867          |
|            | 3,704          | 0,818         | 3,529          | 0,755         | 1,771          | 0,773          |
|            | 5,063          | 0,914         | 1,451          | 0,96          | 4,579          | 0,844          |
|            | 2,92           | 1,024         | 3,303          | 0,835         | 5,646          | 0,781          |
|            | 2,405          | 0,936         | 1,304          | 0,596         | 2,179          | 0,683          |
|            | 3,039          | 0,862         | 2,443          | 0,719         | 4,208          | 1,026          |
|            | 4,155          | 0,668         | 3,445          | 0,657         | 4,249          | 0,741          |
|            | 3,373          | 1,182         | 1,935          | 1,194         | 3,306          | 0,838          |
|            | 5,268          | 0,966         | 3,572          | 0,705         | 3,734          | 0,663          |
|            | 4,609          | 0,732         | 4,512          | 0,583         | 2,89           | 0,865          |
|            | 5,685          | 0,831         | 4,656          | 0,56          | 1,572          | 0,895          |
|            | 3,189          | 0,911         | 3,114          | 0,861         | 3,604          | 0,679          |
|            | 4,897          | 0,994         | 2,061          | 0,859         | 4,286          | 0,676          |
|            | 4,45           | 0,734         | 2,352          | 0,722         | 1,923          | 1,114          |
|            | 3,917          | 0,862         | 4,515          | 0,665         | 3,885          | 0,93           |
|            | 3,831          | 1,143         | 3,272          | 0,679         | 3,825          | 0,766          |
|            | 4,298          | 0,98          | 2,923          | 0,9           | 3,077          | 0,953          |
|            | <b>4,0289</b>  | <b>0,9225</b> | <b>3,08945</b> | <b>0,7416</b> | <b>3,4069</b>  | <b>0,82345</b> |
| <b>130</b> | 3,405          | 1,059         | 3,331          | 0,679         | 3,304          | 0,802          |
|            | 3,637          | 0,714         | 3,586          | 0,692         | 3,4            | 0,795          |
|            | 3,366          | 1,114         | 3,191          | 0,599         | 2,816          | 1,043          |
|            | 3,937          | 1,007         | 1,608          | 1,105         | 4,354          | 0,642          |
|            | 4,15           | 0,907         | 3,146          | 0,781         | 3,973          | 0,831          |
|            | 3,595          | 1,238         | 1,775          | 1,195         | 3,005          | 0,869          |
|            | 4,406          | 0,971         | 1,647          | 1,083         | 3,482          | 0,955          |
|            | 2,512          | 0,825         | 2,426          | 0,747         | 3,581          | 0,596          |
|            | 4,551          | 0,831         | 3,413          | 0,651         | 3,573          | 0,972          |
|            | 4,146          | 0,826         | 4,221          | 0,668         | 3,691          | 0,837          |
|            | 3,541          | 0,828         | 2,145          | 1,029         | 3,36           | 0,783          |
|            | 4,274          | 0,764         | 4,087          | 0,691         | 3,481          | 0,774          |
|            | 3,592          | 0,809         | 3,183          | 0,918         | 3,374          | 0,845          |
|            | 4,859          | 0,796         | 3,992          | 0,698         | 2,055          | 0,826          |
|            | 5,803          | 0,849         | 3,191          | 0,801         | 2,098          | 1,093          |
|            | 3,119          | 1,057         | 1,353          | 0,688         | 4,322          | 0,683          |
|            | 4,752          | 0,681         | 2,95           | 0,885         | 2,522          | 0,766          |
|            | 4,561          | 0,773         | 4,679          | 0,589         | 3,249          | 0,983          |
|            | 2,484          | 1,158         | 5,477          | 0,67          | 3,273          | 0,803          |

|            |                |                |                |                |                |                |
|------------|----------------|----------------|----------------|----------------|----------------|----------------|
|            | 5,504          | 0,872          | 1,593          | 0,715          | 2,071          | 0,922          |
|            | <b>4,0097</b>  | <b>0,90395</b> | <b>3,0497</b>  | <b>0,7942</b>  | <b>3,2492</b>  | <b>0,841</b>   |
| <b>135</b> | 3,629          | 0,821          | 2,885          | 0,818          | 3,434          | 0,931          |
|            | 3,023          | 1,068          | 3,571          | 0,55           | 3,894          | 0,685          |
|            | 4,225          | 0,854          | 1,84           | 0,886          | 2,921          | 0,759          |
|            | 2,704          | 1,074          | 1,808          | 0,891          | 3,622          | 0,875          |
|            | 4,1            | 1,1            | 4,636          | 0,811          | 2,65           | 0,709          |
|            | 3,946          | 1,017          | 2,401          | 0,949          | 2,821          | 0,678          |
|            | 3,194          | 1,016          | 1,662          | 1,18           | 3,475          | 0,746          |
|            | 3,886          | 1,044          | 3,439          | 0,668          | 3,393          | 0,67           |
|            | 3,819          | 1,006          | 3,536          | 0,643          | 3,469          | 0,771          |
|            | 2,692          | 1,171          | 1,543          | 0,787          | 2,397          | 0,801          |
|            | 3,261          | 1,063          | 1,98           | 1,013          | 3,936          | 0,702          |
|            | 3,142          | 0,999          | 3,733          | 0,68           | 3,149          | 0,671          |
|            | 3,347          | 1,113          | 2,44           | 0,945          | 3,379          | 0,855          |
|            | 5,543          | 0,694          | 3,287          | 0,829          | 4,671          | 0,717          |
|            | 3,971          | 0,722          | 1,901          | 1,05           | 3,444          | 0,811          |
|            | 4,501          | 0,648          | 2,983          | 0,86           | 3,94           | 0,699          |
|            | 3,519          | 0,926          | 3,955          | 0,564          | 3,89           | 0,683          |
|            | 4,247          | 1,11           | 2,833          | 0,622          | 4,177          | 0,983          |
|            | 3,024          | 1,139          | 3,865          | 0,669          | 2,587          | 0,978          |
|            | 4,921          | 0,99           | 1,445          | 1,208          | 3,069          | 0,9            |
|            | <b>3,7347</b>  | <b>0,97875</b> | <b>2,78715</b> | <b>0,83115</b> | <b>3,4159</b>  | <b>0,7812</b>  |
| <b>140</b> | 3,909          | 1,232          | 2,09           | 1,054          | 2,166          | 0,873          |
|            | 3,599          | 0,917          | 2,42           | 1,026          | 2,704          | 0,816          |
|            | 3,036          | 1,097          | 1,979          | 1,091          | 3,949          | 0,789          |
|            | 3,664          | 1,157          | 1,507          | 1,02           | 3,872          | 0,772          |
|            | 3,411          | 1,094          | 3,119          | 0,649          | 2,788          | 0,709          |
|            | 2,896          | 1,03           | 3,495          | 0,934          | 2,792          | 0,786          |
|            | 3,508          | 1,025          | 2,055          | 1,204          | 3,876          | 1,017          |
|            | 2,7            | 1,107          | 2,464          | 1,009          | 2,245          | 0,807          |
|            | 2,593          | 1,229          | 2,792          | 0,797          | 3,64           | 0,858          |
|            | 1,828          | 1,098          | 3,965          | 0,816          | 1,944          | 0,854          |
|            | 3,651          | 1,244          | 3,354          | 1,264          | 3,962          | 0,768          |
|            | 4,26           | 0,918          | 1,393          | 0,947          | 3,203          | 0,959          |
|            | 3,6            | 1,227          | 3,33           | 0,873          | 2,903          | 1,178          |
|            | 4,071          | 0,904          | 2,711          | 0,946          | 2,863          | 0,684          |
|            | 3,728          | 0,806          | 1,813          | 1,245          | 3,7            | 0,807          |
|            | 4,082          | 0,744          | 2,494          | 0,766          | 2,279          | 0,744          |
|            | 2,379          | 0,978          | 2,642          | 0,992          | 2,327          | 0,852          |
|            | 4,758          | 0,912          | 1,83           | 0,883          | 2,403          | 0,946          |
|            | 3,712          | 1,053          | 2,975          | 0,993          | 3,384          | 0,938          |
|            | 2,252          | 1,253          | 0,788          | 0,98           | 1,557          | 0,886          |
|            | <b>3,38185</b> | <b>1,05125</b> | <b>2,4608</b>  | <b>0,97445</b> | <b>2,92785</b> | <b>0,85215</b> |
| <b>145</b> | 2,412          | 1,207          | 1,385          | 0,893          | 3,851          | 0,824          |
|            | 3,667          | 0,95           | 2,498          | 0,791          | 3,111          | 0,753          |
|            | 2,939          | 1,225          | 3,494          | 0,76           | 3,367          | 0,969          |
|            | 4,413          | 1,147          | 2,776          | 0,829          | 2,8            | 0,894          |
|            | 2,058          | 1,179          | 3,887          | 0,697          | 1,925          | 0,804          |
|            | 3,207          | 1,194          | 1,875          | 1,038          | 2,817          | 0,664          |
|            | 1,589          | 1,262          | 2,43           | 1,018          | 3,998          | 0,655          |
|            | 4,114          | 0,998          | 2,411          | 0,744          | 3,197          | 0,713          |
|            | 2,391          | 0,972          | 2,157          | 1,074          | 2,547          | 0,982          |
|            | 4,586          | 0,796          | 3,629          | 0,952          | 2,875          | 0,87           |



|            |                |                |                |                |               |                |
|------------|----------------|----------------|----------------|----------------|---------------|----------------|
|            | 1,733          | 1,288          | 3,388          | 1,167          | 3,794         | 0,751          |
|            | 4,366          | 1,064          | 2,909          | 0,916          | 4,698         | 0,711          |
|            | 2,341          | 0,971          | 1,596          | 0,792          | 4,247         | 0,776          |
|            | 5,659          | 0,736          | 5,673          | 0,634          | 3,307         | 0,672          |
|            | 2,31           | 1,376          | 1,372          | 0,968          | 4,122         | 0,636          |
|            | 4,767          | 1,068          | 2,309          | 0,712          | 5,156         | 0,654          |
|            | 2,713          | 0,804          | 2,573          | 0,871          | 3,476         | 0,763          |
|            | 5,177          | 0,824          | 4,915          | 0,682          | 2,794         | 0,88           |
|            | 4,245          | 0,956          | 3,609          | 1,047          | 4,092         | 0,879          |
|            | 4,735          | 0,788          | 1,91           | 1,32           | 1,938         | 0,708          |
|            | <b>3,4711</b>  | <b>1,04025</b> | <b>2,8398</b>  | <b>0,89525</b> | <b>3,4056</b> | <b>0,7779</b>  |
| <b>150</b> | 3,337          | 1,045          | 2,705          | 0,831          | 3,079         | 0,702          |
|            | 3,232          | 1,113          | 4,184          | 0,759          | 2,801         | 0,739          |
|            | 4,139          | 1,224          | 1,463          | 1,128          | 3,992         | 0,825          |
|            | 5,561          | 1,321          | 2,716          | 0,845          | 3,43          | 0,708          |
|            | 3,573          | 1,035          | 2,08           | 0,932          | 2,103         | 1,024          |
|            | 4,398          | 1,358          | 2,825          | 0,923          | 2,562         | 0,799          |
|            | 4,725          | 0,817          | 1,69           | 1,001          | 2,208         | 0,942          |
|            | 3,074          | 1,223          | 2,524          | 1,101          | 2,821         | 0,752          |
|            | 5,888          | 0,77           | 2,287          | 0,928          | 2,358         | 0,938          |
|            | 3,882          | 1,118          | 2,002          | 1,3            | 1,912         | 0,777          |
|            | 3,426          | 1,199          | 2,151          | 1,329          | 4,048         | 0,846          |
|            | 2,652          | 1,041          | 3,445          | 0,801          | 3,57          | 0,785          |
|            | 3,019          | 1,256          | 2,36           | 1,152          | 2,066         | 1,019          |
|            | 3,787          | 0,923          | 1,279          | 1,272          | 3,503         | 0,729          |
|            | 3,242          | 1,143          | 2,591          | 1,154          | 2,731         | 0,77           |
|            | 3,109          | 1,164          | 2,084          | 0,926          | 4,527         | 0,769          |
|            | 2,316          | 1,061          | 1,093          | 1,285          | 3,228         | 0,743          |
|            | 4,197          | 1,126          | 4,024          | 0,871          | 3,226         | 0,792          |
|            | 3,776          | 1,008          | 3,527          | 0,917          | 1,188         | 1,172          |
|            | 3,999          | 0,96           | 2,397          | 0,998          | 2,337         | 1,058          |
|            | <b>3,7666</b>  | <b>1,09525</b> | <b>2,47135</b> | <b>1,02265</b> | <b>2,8845</b> | <b>0,84445</b> |
| <b>155</b> | 4,813          | 0,725          | 3,388          | 1,08           | 2,997         | 1,007          |
|            | 3,047          | 0,954          | 3,338          | 0,816          | 2,418         | 0,973          |
|            | 2,656          | 0,896          | 1,455          | 0,985          | 2,882         | 1,027          |
|            | 2,502          | 1,159          | 1,052          | 1,038          | 3,19          | 0,961          |
|            | 2,264          | 1,587          | 1,933          | 1,111          | 1,193         | 1,018          |
|            | 2,76           | 1,044          | 3,04           | 1,029          | 2,592         | 0,639          |
|            | 3,25           | 1,281          | 1,728          | 1,012          | 3,347         | 1,034          |
|            | 4,307          | 0,877          | 2,52           | 0,98           | 3,025         | 0,767          |
|            | 3,69           | 0,813          | 2,612          | 0,896          | 1,427         | 1,01           |
|            | 4,564          | 0,775          | 3,47           | 1,053          | 2,746         | 0,912          |
|            | 3,288          | 1,211          | 2,707          | 1,146          | 3,181         | 0,804          |
|            | 3,173          | 1,549          | 2,256          | 0,89           | 3,65          | 0,636          |
|            | 2,085          | 1,139          | 2,686          | 1,17           | 3,199         | 0,959          |
|            | 4,274          | 1,094          | 3,518          | 0,836          | 2,739         | 0,694          |
|            | 3,887          | 0,994          | 2,967          | 1,06           | 2,986         | 0,782          |
|            | 2,557          | 1,08           | 2,837          | 0,952          | 3,039         | 0,754          |
|            | 2,687          | 1,317          | 1,482          | 1,241          | 3,454         | 0,725          |
|            | 3              | 1,25           | 2,19           | 0,789          | 2,592         | 0,903          |
|            | 3,469          | 1,209          | 3,415          | 0,973          | 4,336         | 1,089          |
|            | 5,188          | 0,812          | 1,809          | 1,043          | 3,095         | 1,041          |
|            | <b>3,37305</b> | <b>1,0883</b>  | <b>2,52015</b> | <b>1,005</b>   | <b>2,9044</b> | <b>0,88675</b> |
| <b>160</b> | 2,973          | 1,007          | 3,519          | 1,296          | 1,734         | 1,095          |

|                |               |               |               |                |                |
|----------------|---------------|---------------|---------------|----------------|----------------|
| 4,546          | 0,683         | 4,705         | 0,908         | 3,416          | 0,931          |
| 3,783          | 1,18          | 4,175         | 0,904         | 2,953          | 1,303          |
| 3,083          | 1,245         | 1,996         | 1,018         | 2,863          | 0,832          |
| 2,141          | 1,444         | 1,441         | 1,121         | 2,849          | 0,892          |
| 2,355          | 1,035         | 2,66          | 0,937         | 1,68           | 0,773          |
| 4,323          | 1,121         | 1,981         | 1,333         | 2,979          | 1,042          |
| 2,859          | 0,962         | 2,988         | 1,083         | 2,656          | 0,72           |
| 3,327          | 1,076         | 1,991         | 1,081         | 1,986          | 1,005          |
| 3,692          | 0,812         | 2,124         | 1,407         | 2,988          | 0,913          |
| 1,964          | 1,316         | 4,015         | 0,965         | 4,048          | 0,808          |
| 3,073          | 1,453         | 2,347         | 1,272         | 3,529          | 0,741          |
| 2,12           | 1,4           | 2,253         | 1,119         | 4,679          | 0,943          |
| 3,818          | 1,207         | 2,719         | 0,979         | 2,124          | 0,961          |
| 2,551          | 1,566         | 1,516         | 1,324         | 2,89           | 0,781          |
| 4,13           | 0,92          | 2,118         | 1,194         | 2,894          | 0,699          |
| 2,827          | 1,136         | 1,23          | 1,198         | 2,657          | 1,013          |
| 3,806          | 1,036         | 2,942         | 0,786         | 3,226          | 0,702          |
| 3,784          | 1,301         | 3,052         | 1,115         | 3,201          | 0,881          |
| 3,162          | 1,144         | 1,31          | 1,018         | 2,881          | 0,914          |
| <b>3,21585</b> | <b>1,1522</b> | <b>2,5541</b> | <b>1,1029</b> | <b>2,91165</b> | <b>0,89745</b> |

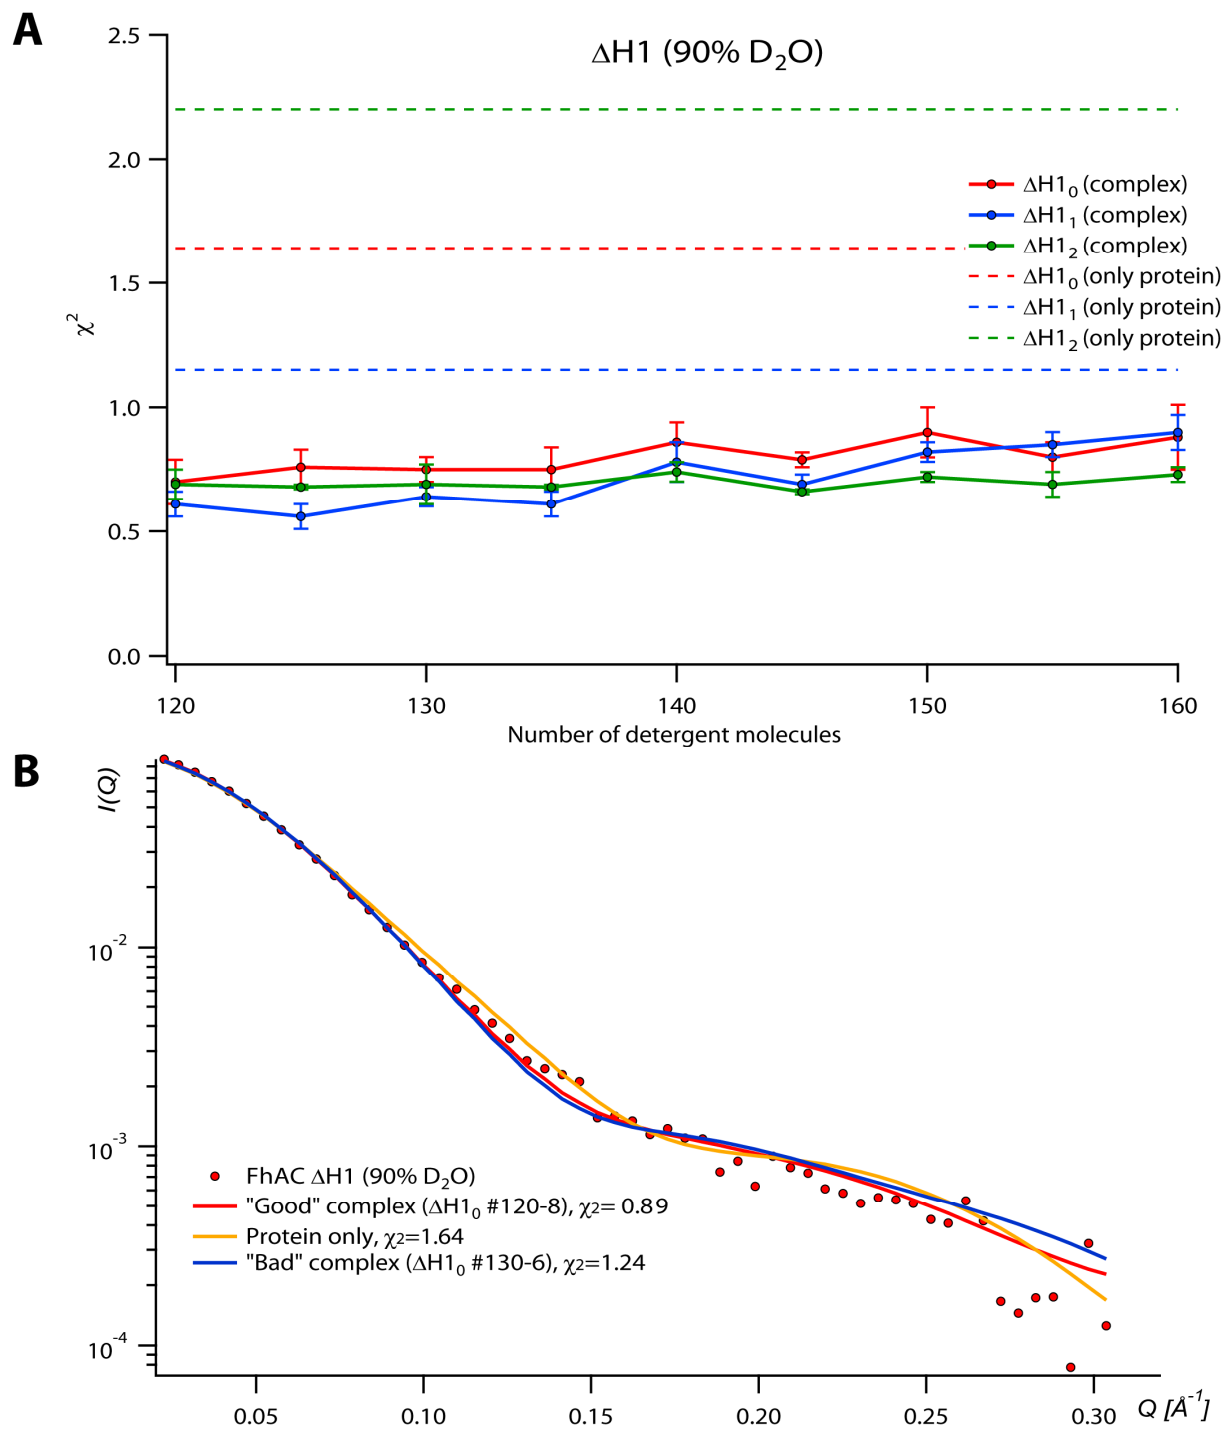

**Figure S3. Modeling detergent- FhaC- $\Delta H1$  complexes at 90%  $D_2O$ .**

A:  $\chi^2$  versus detergent number. B: superposition of experiment and modeled  $I(Q)$ .

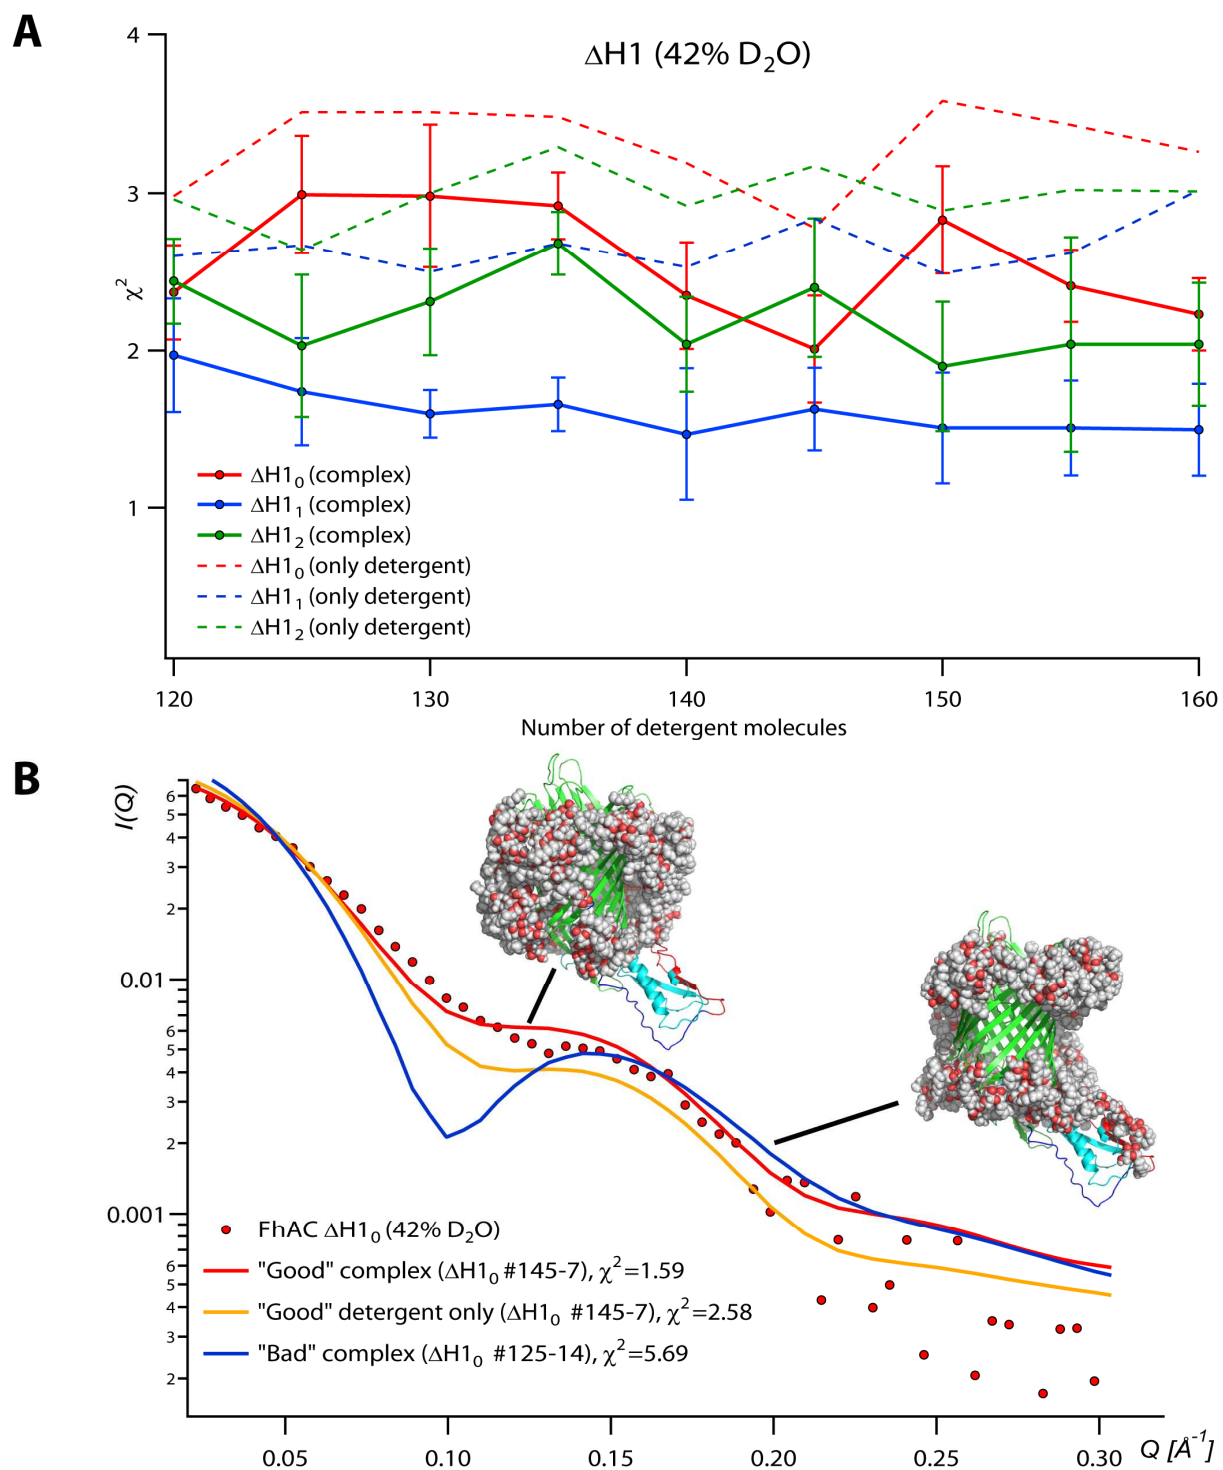

**Figure S4. Modeling detergent- FhaC- $\Delta H1$  complexes at 42% D<sub>2</sub>O.**

A:  $\chi^2$  versus detergent number. B: superposition of experimental and modeled  $I(Q)$  from  $\Delta H1_0$ .

**Table S4. Overview over the 100 WT FhaC models with a reduced detergent belt (140 detergent molecules out of an initial 200) and their respective  $\chi^2$  fit values with the program CRYSON.**

|     | WT <sub>0</sub> reduced belt |                      |
|-----|------------------------------|----------------------|
|     | 42% D <sub>2</sub> O         | 90% D <sub>2</sub> O |
| 140 | 1.153                        | 1.896                |
|     | 5.292                        | 1.611                |
|     | 5.785                        | 1.228                |
|     | 4.551                        | 1.434                |
|     | 3.746                        | 2.14                 |
|     | 2.562                        | 1.464                |
|     | 2.157                        | 2.165                |
|     | 4.062                        | 2.214                |
|     | 3.878                        | 1.77                 |
|     | 2.546                        | 1.639                |
|     | 2.242                        | 1.593                |
|     | 4.05                         | 1.655                |
|     | 4.242                        | 1.792                |
|     | 5.062                        | 1.693                |
|     | 5.407                        | 1.194                |
|     | 4.009                        | 1.63                 |
|     | 6.263                        | 1.308                |
|     | 3.269                        | 1.745                |
|     | 1.887                        | 2.654                |
|     | 7.58                         | 1.604                |
|     | 3.723                        | 1.573                |
|     | 4.969                        | 1.357                |
|     | 4.824                        | 1.389                |
|     | 4.957                        | 1.526                |
|     | 5.9                          | 1.189                |
|     | 6.227                        | 1.772                |
|     | 3.259                        | 1.461                |
|     | 4.58                         | 1.24                 |
|     | 4.432                        | 1.743                |
|     | 4.231                        | 1.728                |
|     | 4.947                        | 1.607                |
|     | 2.88                         | 1.888                |
|     | 2.981                        | 1.683                |
|     | 5.474                        | 1.735                |
|     | 2.85                         | 1.344                |
|     | 6.094                        | 1.876                |
|     | 2.442                        | 1.595                |
|     | 3.968                        | 1.567                |
|     | 6.485                        | 1.473                |
|     | 3.243                        | 1.727                |
|     | 1.153                        | 1.896                |
|     | 5.292                        | 1.611                |
|     | 3.442                        | 2.782                |
|     | 3.187                        | 1.453                |
|     | 3.746                        | 2.14                 |
|     | 2.562                        | 1.464                |
|     | 2.336                        | 1.522                |
|     | 3.366                        | 1.902                |
|     | 3.955                        | 1.696                |
|     | 4.319                        | 1.376                |
|     | 4.472                        | 2.012                |
|     | 5.666                        | 1.642                |
|     | 3.387                        | 1.906                |
|     | 5.558                        | 1.647                |
|     | 5.407                        | 1.194                |
|     | 3.264                        | 1.643                |
|     | 2.944                        | 1.429                |
|     | 3.408                        | 1.399                |
|     | 4.33                         | 1.537                |

|  |       |       |
|--|-------|-------|
|  | 5.108 | 1.645 |
|  | 6.945 | 1.26  |
|  | 2.421 | 1.43  |
|  | 4.824 | 1.389 |
|  | 4.895 | 1.741 |
|  | 3.218 | 1.836 |
|  | 3.765 | 1.633 |
|  | 6.514 | 2.12  |
|  | 4.58  | 1.24  |
|  | 6.833 | 1.282 |
|  | 2.255 | 1.602 |
|  | 2.077 | 2.423 |
|  | 2.88  | 1.888 |
|  | 6.79  | 1.262 |
|  | 7.952 | 1.403 |
|  | 3.636 | 2.064 |
|  | 6.094 | 1.876 |
|  | 2.67  | 2.562 |
|  | 2.368 | 1.834 |
|  | 5.58  | 1.653 |
|  | 2.931 | 2.167 |
|  | 2.245 | 1.871 |
|  | 5.415 | 1.493 |
|  | 4.306 | 1.843 |
|  | 3.569 | 1.612 |
|  | 5.191 | 1.078 |
|  | 2.562 | 1.464 |
|  | 4.688 | 1.89  |
|  | 4.493 | 1.468 |
|  | 2.875 | 2.178 |
|  | 2.876 | 1.481 |
|  | 4.746 | 1.274 |
|  | 4.258 | 1.839 |
|  | 4.403 | 1.597 |
|  | 2.355 | 1.701 |
|  | 6.368 | 2.116 |
|  | 4.009 | 1.63  |
|  | 2.944 | 1.429 |
|  | 4.621 | 1.834 |
|  | 4.255 | 1.257 |
|  | 4.327 | 1.357 |
|  | 4.15  | 1.67  |

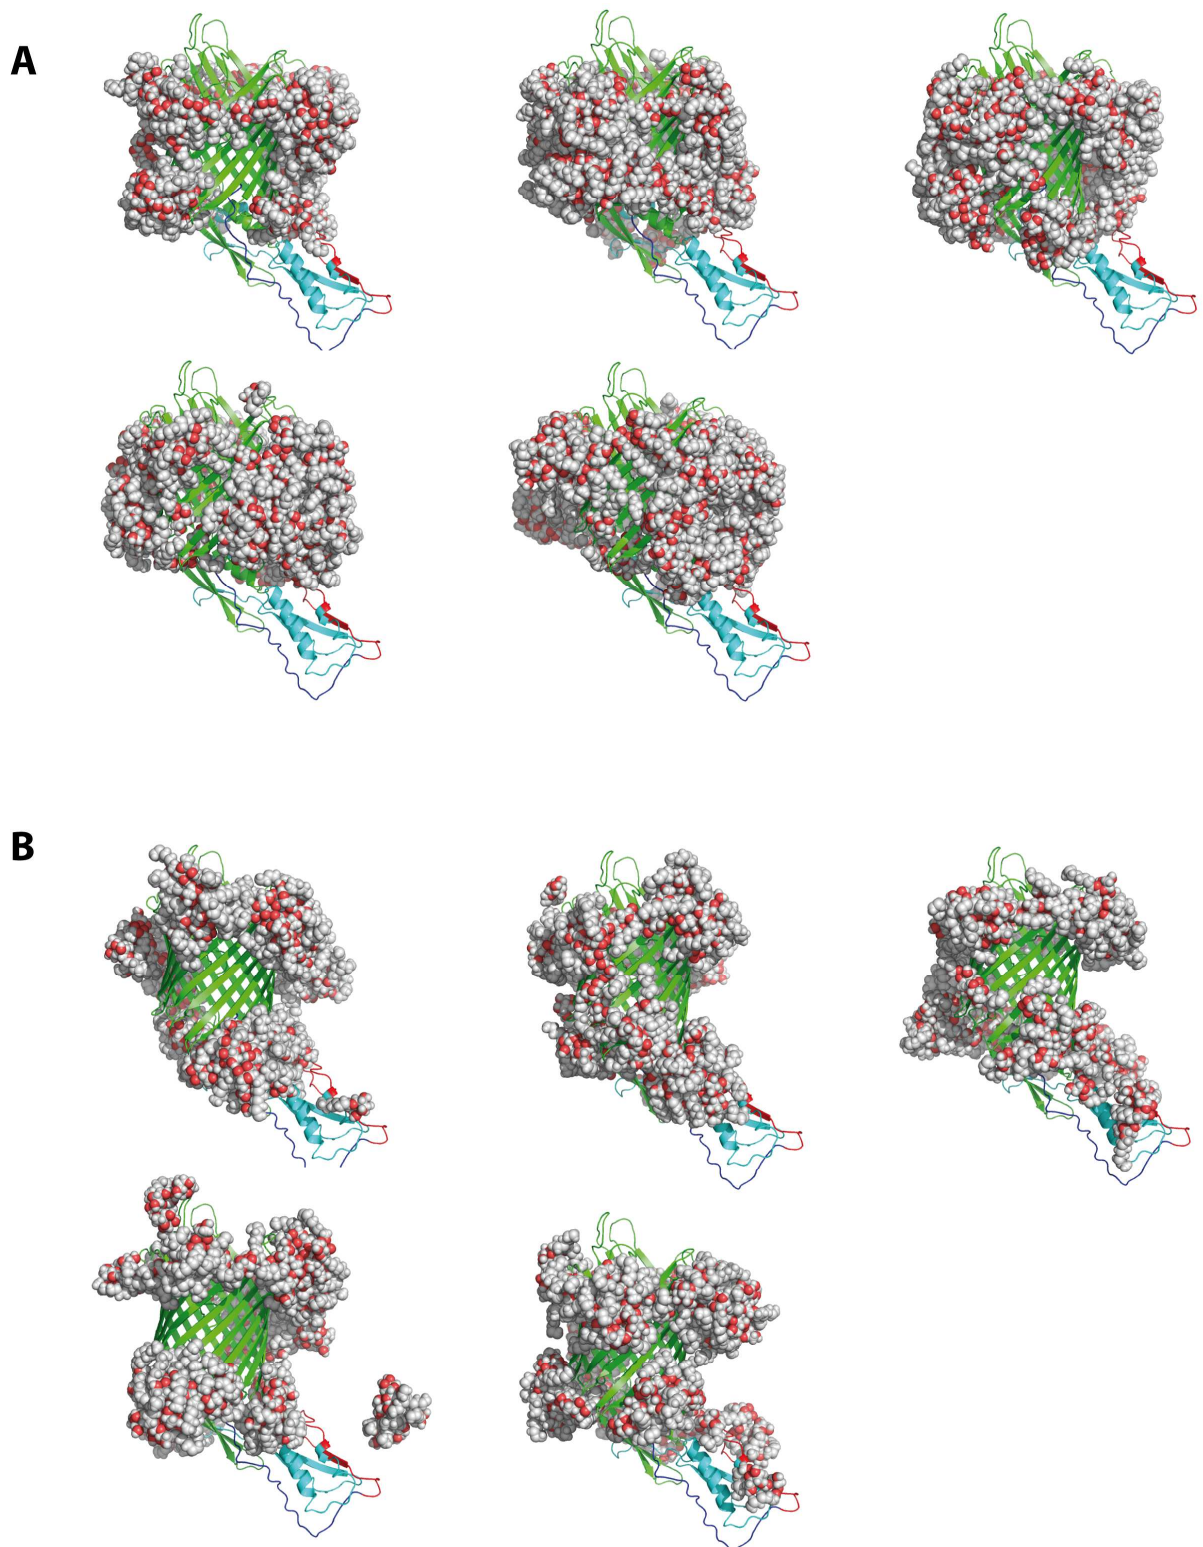

**Figure S5. FhaC- $\Delta$ H1 -detergent models corresponding to good (A) and bad (B) fits.**

### **Supporting references.**

- (1) Salvay, A. G., M. Santamaria, M. le Maire, and C. Ebel. 2007. Analytical Ultracentrifugation Sedimentation Velocity for the Characterization of Detergent–Solubilized Membrane Proteins Ca<sup>++</sup>-ATPase and ExbB. *J. Biol. Physics*. 33 399-419.
- (2) Solovyova, A., P. Schuck, L. Costenaro, and C. Ebel. 2001. Non-ideality by sedimentation velocity of halophilic malate dehydrogenase in complex solvents. *Biophys. J.* 81: 1868-1880.
- (3) le Maire, M., P. Champeil, and J. V. Møller. 2000. Interaction of membrane proteins and lipids with solubilizing detergents. *Biochim. Biophys. Acta*. 1508: 86-111.
- (4) Le Roy, A., H. Nury, B. Wiseman, J. Sarwan, J. M. Jault , and C. Ebel. 2013. Sedimentation velocity analytical ultracentrifugation in hydrogenated and deuterated solvents for the characterization of membrane proteins. *Methods Mol Biol*. 1033: 219-251.
